# Supplementary material for: Gα12 overexpressed in hepatocellular carcinoma reduces microRNA-122 expression via HNF4α inactivation, which causes c-Met induction
Source: PubMed Central journal article supplement (PMC4662475; doi:10.18632/oncotarget.3957), 2015-04-29
Supplement: oncotarget-06-19055-s001.pdf [file oncotarget-06-19055-s001.pdf]

## **G $\alpha_{12}$ overexpressed in hepatocellular carcinoma reduces microRNA-122 expression via HNF4 $\alpha$ inactivation, which causes c-Met induction**

### **Supplementary Material**

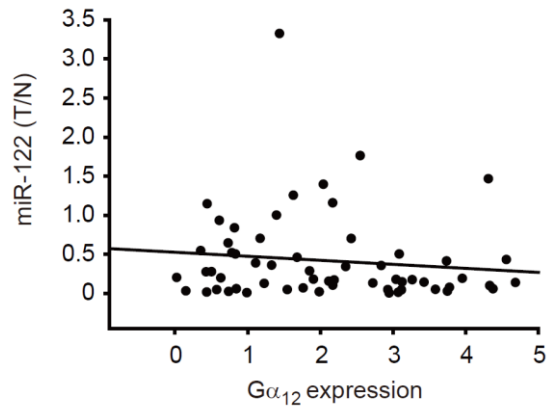

Supplementary Figure 1. Scatter plot of G $\alpha_{12}$  versus miR-122 levels in patients with HCC.

Immunoblottings for G $\alpha_{12}$  and qRT-PCR assays for miR-122 were carried out on the homogenates of 59 pairs of HCC samples. There was no significant correlation between G $\alpha_{12}$  and miR-122 levels by Pearson or Spearman correlation coefficients.

### Supplementary Table

#### *Sequences of Primers*

| <b>Primers</b> | <b>Sequences</b>                                                    |
|----------------|---------------------------------------------------------------------|
| Pri-miR-122    | F: 5'-ACCCTTTCCTTTTCAGCAT-3'<br>R: 5'-GGGAGATGAGGGGAGAGAAG-3'       |
| Pre-miR-122    | F: 5'-AGCAGAGCTGTGGAGTGTGA-3'<br>R: 5'-GCCTAGCAGTAGCTATTTAGTGTGA-3' |
| Mature-miR-122 | 5'-TGGAGTGTGACAATGGTGTTTG-3'                                        |
| c-Met          | F: 5'-CAGGCAGTGCAGCATGTAGT-3'<br>R: 5'-GATGATTCCCTCGGTCAGAA-3'      |
| GNA12          | F: 5'-CTCAAGGGCTCAAGGGTTCTT-3'<br>R: 5'-CAGGAACATCCCATGCTTCTC-3'    |
| HNF4 $\alpha$  | F: 5'-CAGGTGTTGACGATGGGCAATG-3'<br>R: 5'-AGCGGCACTGGTTCCTCTTG-3'    |
| $\beta$ -Actin | F: 5'-ACCCACACTGTGCCCATCTAC-3'<br>R: 5'-TCGGTGAGGATCTTCATGAGGTA-3'  |
